# Supplementary material for: Reconstruction of the Fas-Based Death-Inducing Signaling Complex (DISC) Using a Protein–Protein Docking Meta-Approach
Source: PubMed Central journal article supplement (PMC8389534; doi:10.1021/acs.jcim.1c00301), 2021-07-01
Supplement: ci1c00301_si_001.pdf [file ci1c00301_si_001.pdf]

## Supporting Information

# Reconstruction of the Fas-Based Death Inducing Signaling Complex (DISC) Using a Protein-Protein Docking Meta-Approach

Sayyed Jalil Mahdizadeh<sup>1</sup>, Melissa Thomas<sup>1</sup> and Leif A. Eriksson<sup>1,\*</sup>

<sup>1</sup>Department of Chemistry and Molecular Biology, University of Gothenburg, 405 30 Göteborg, Sweden

Correspondence:

\*Leif A. Eriksson, Department of Chemistry and Molecular Biology,

University of Gothenburg, 405 30 Göteborg, Sweden.

Email: [leif.eriksson@chem.gu.se](mailto:leif.eriksson@chem.gu.se)

Phone: +46 317869117

|            |     |            |     |
|------------|-----|------------|-----|
| Table S1   | P2  | Figure S13 | P13 |
| Figure S1  | P2  | Figure S14 | P13 |
| Figure S2  | P3  | Table S3   | P14 |
| Figure S3  | P4  | Figure S15 | P14 |
| Figure S4  | P5  | Figure S16 | P15 |
| Figure S5  | P6  | Figure S17 | P16 |
| Figure S6  | P7  | Table S4   | P16 |
| Table S2   | P7  | Table S5   | P17 |
| Figure S7  | P9  | Table S6   | P17 |
| Figure S8  | P10 | Table S7   | P17 |
| Figure S8  | P10 | Table S8   | P17 |
| Figure S10 | P11 | Table S9   | P17 |
| Figure S11 | P11 | Table S10  | P17 |
| Figure S12 | P12 | References | P18 |

**Table S1.** Summary of the searching algorithms and scoring functions implemented in the PP docking engines employed in this study.

| Docking engine | Searching algorithm                                                | Scoring function                                                                 | URL                                                                                                                   | Reference |
|----------------|--------------------------------------------------------------------|----------------------------------------------------------------------------------|-----------------------------------------------------------------------------------------------------------------------|-----------|
| HADDOCK        | Flexible Monte Carlo search                                        | Van der Waals, electrostatics, binding site restriction, and buried surface area | <a href="https://wenmr.science.uu.nl/">https://wenmr.science.uu.nl/</a>                                               | 1, 2      |
| ClusPro        | Rigid body Fast Fourier transform (FFT)                            | Shape complementarity, electrostatics and desolvation energy                     | <a href="https://cluspro.bu.edu/">https://cluspro.bu.edu/</a>                                                         | 3, 4      |
| HDOCK          | Rigid body FFT. template-based and ab initio template-free docking | Long range shape complementarity and statistical mechanics-based                 | <a href="http://hdock.phys.hust.edu.cn/">http://hdock.phys.hust.edu.cn/</a>                                           | 5, 6      |
| GRAMM-X        | Rigid body FFT                                                     | shape complementarity and hydrophobicity                                         | <a href="http://vakser.cmpbio.ku.edu/resources/gramm/grammx/">http://vakser.cmpbio.ku.edu/resources/gramm/grammx/</a> | 7         |
| ZDOCK          | Rigid body FFT                                                     | shape complementarity, Van der Waals, electrostatics, desolvation energy         | <a href="https://zdock.massmed.edu/">https://zdock.massmed.edu/</a>                                                   | 8, 9      |

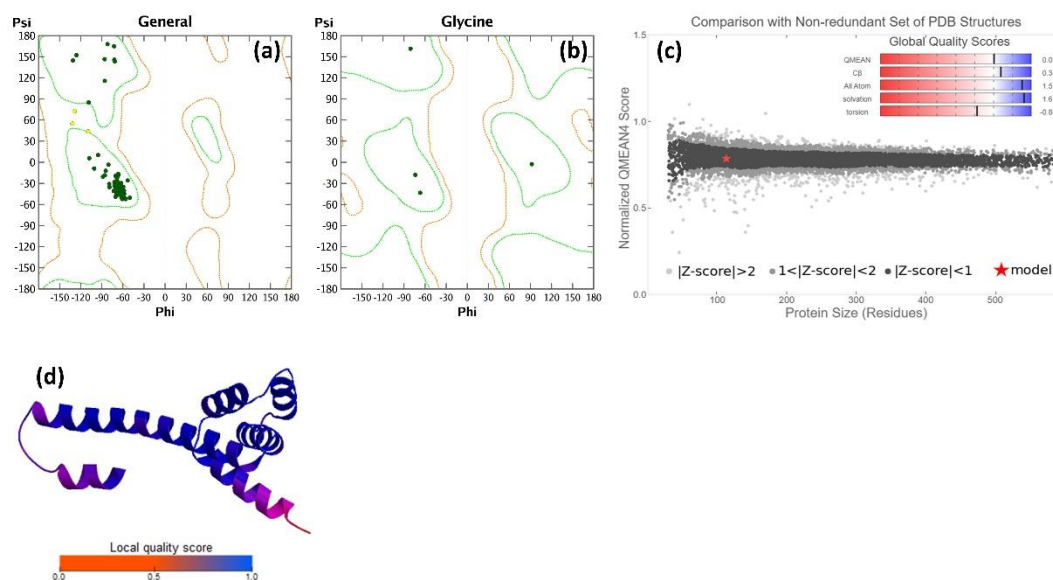

**Figure S1.** Structural quality assessment for the homology model of DR Fas<sub>DD</sub>. Ramachandran plots of (a) General and (b) Glycine residues. The green and yellow circles represent the residues located in core and allowed regions, respectively. (c) Global quality estimation of the model through comparison of the normalized QMEAN4 scores (marked by red asterisk) with a non-redundant set of pdb structures of similar size. The QMEAN score of the model and its components (C $\beta$ , all-atom, solvation, and torsion) are shown as inset. (d) Local quality estimation based on the residue QMEAN score values.

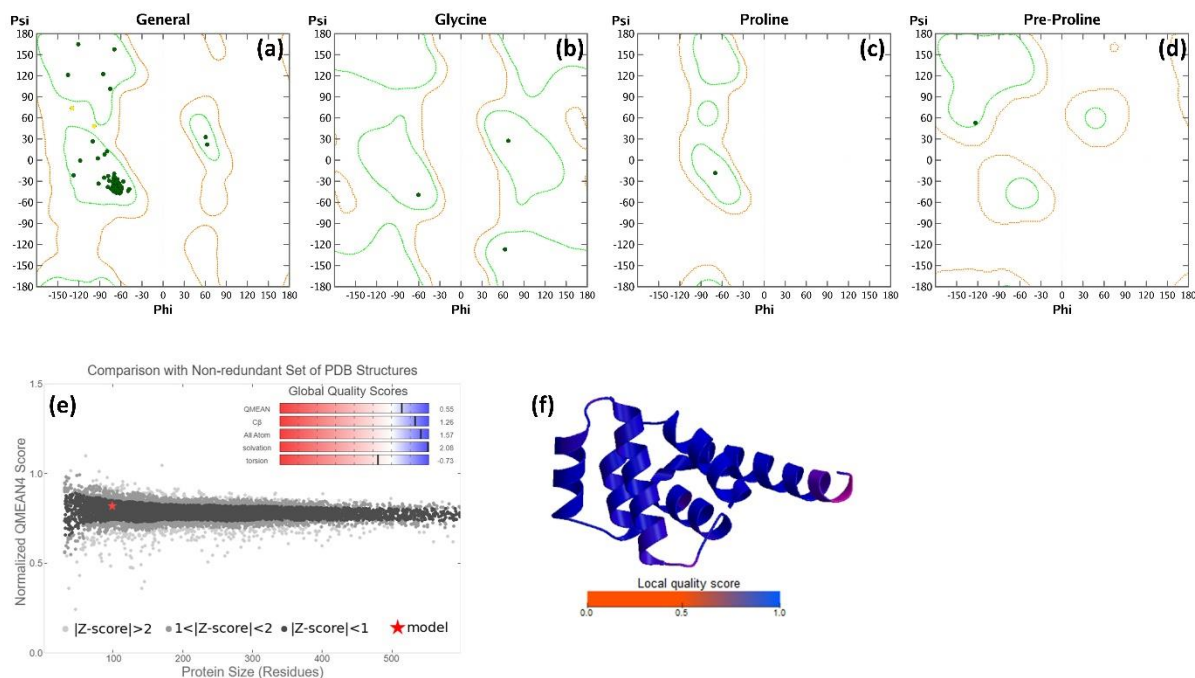

**Figure S2.** Structural quality assessment for the homology model of FADD<sub>DD</sub>. Ramachandran plots of (a) General, (b) Glycine, (c) Proline, and (d) Pre-Proline residues. The green and yellow circles represent the residues located in core and allowed regions, respectively. (e) Global quality estimation of the model through comparison of the normalized QMEAN4 scores (marked by red asterisk) with a non-redundant set of pdb structures of similar size. The QMEAN score of the model and its components (C $\beta$ , all-atom, solvation, and torsion) are shown as inset. (f) Local quality estimation based on the residue QMEAN score values.

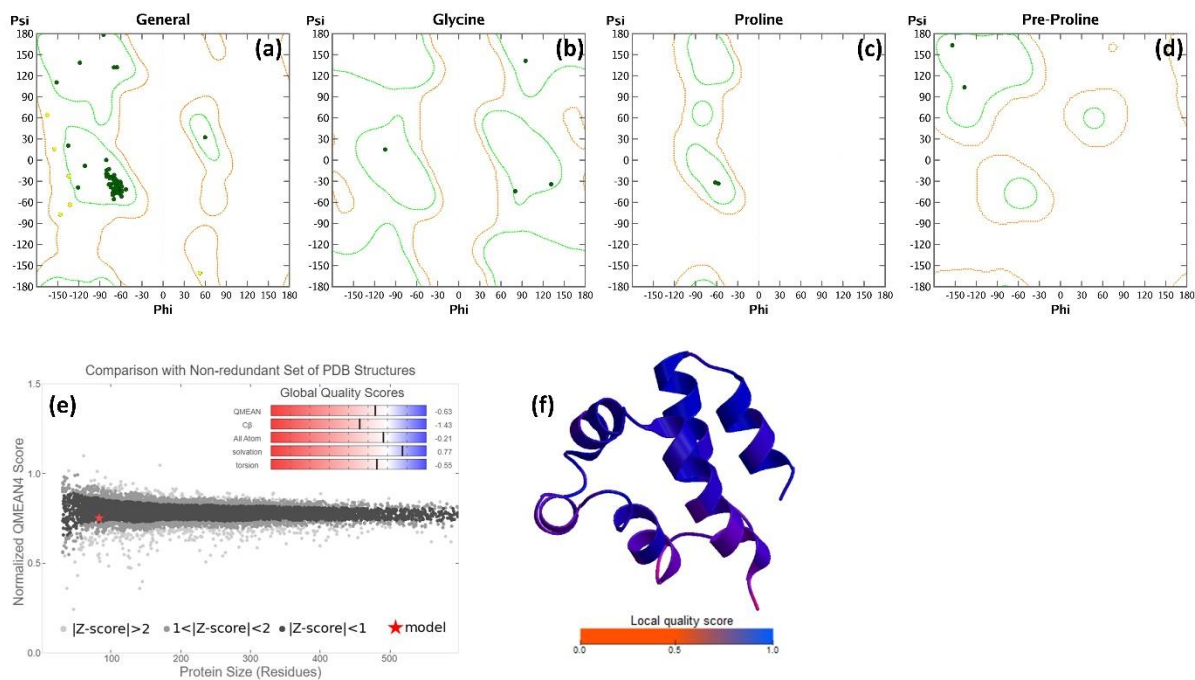

**Figure S3.** Structural quality assessment for the homology model of FADD<sub>DED</sub>. Ramachandran plots of (a) General, (b) Glycine, (c) Proline, and (d) Pre-Proline residues. The green and yellow circles represent the residues located in core and allowed regions, respectively. (e) Global quality estimation of the model through comparison of the normalized QMEAN4 scores (marked by red asterisk) a non-redundant set of pdb structures of similar size. The QMEAN score of the model and its components (CB, all-atom, solvation, and torsion) are shown as inset. (f) Local quality estimation based on the residue QMEAN score values.

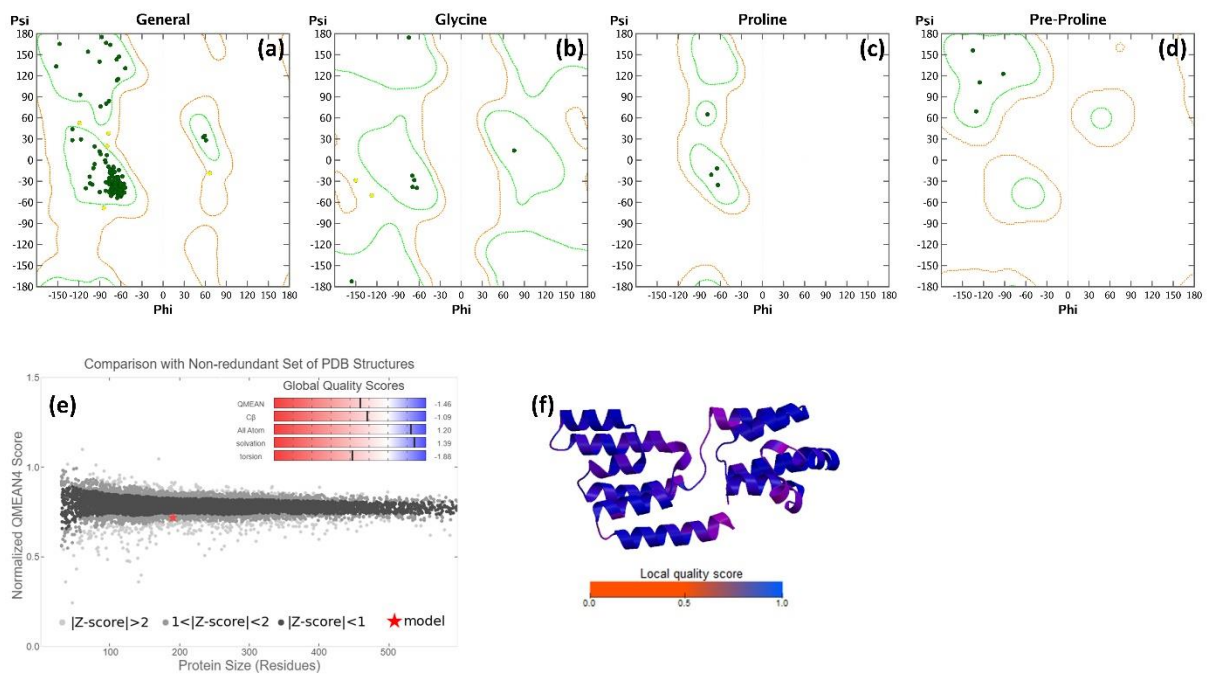

**Figure S4.** Structural quality assessment for the homology model of FADD<sub>full</sub>. Ramachandran plots of (a) General, (b) Glycine, (c) Proline, and (d) Pre-Proline residues. The green and yellow circles represent the residues located in core and allowed regions, respectively. (e) Global quality estimation of the model through comparison of normalized QMEAN4 scores (marked by red asterisk) with a non-redundant set of pdb structures of similar size. The QMEAN score of the model and its components (CB, all-atom, solvation, and torsion) are shown as inset. (f) Local quality estimation based on the residue QMEAN score values.

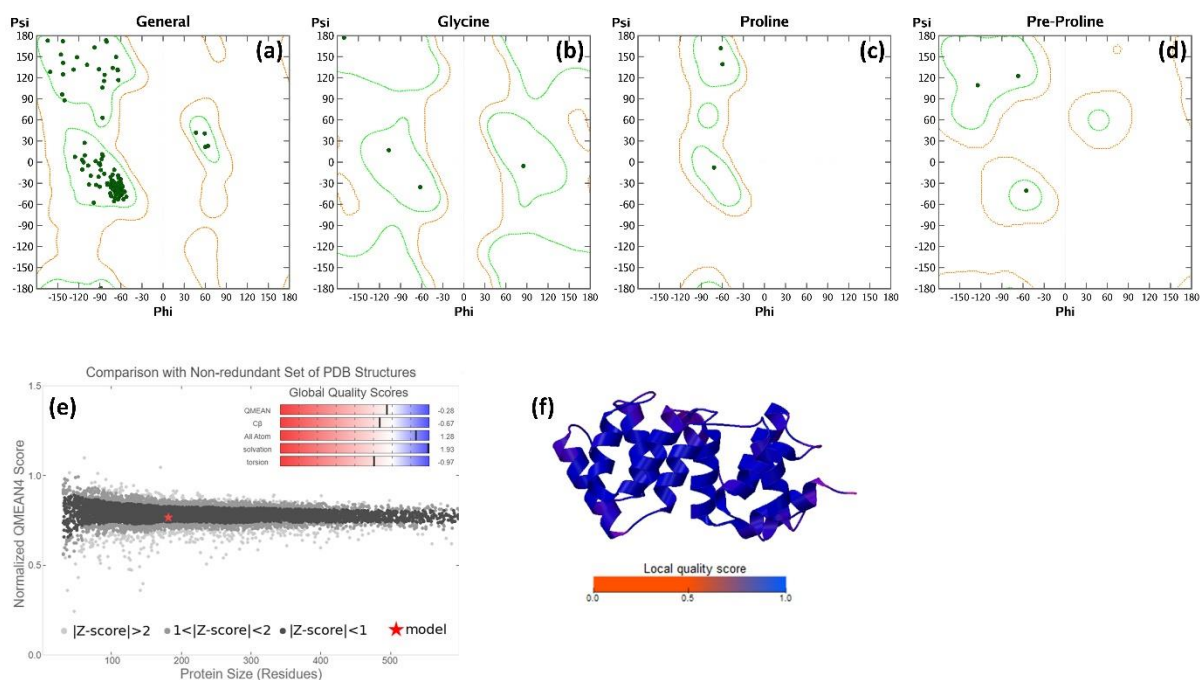

**Figure S5.** Structural quality assessment for the homology model of C8<sub>DEDS</sub>. Ramachandran plots of (a) General, (b) Glycine, (c) Proline, and (d) Pre-Proline residues. The green and yellow circles represent the residues located in core and allowed regions, respectively. (e) Global quality estimation of the model through comparison of the normalized QMEAN4 scores (marked by red asterisk) with a non-redundant set of pdb structures of similar size. The QMEAN score of the model and its components (C $\beta$ , all-atom, solvation, and torsion) are shown as inset. (f) Local quality estimation based on the residue QMEAN score values.

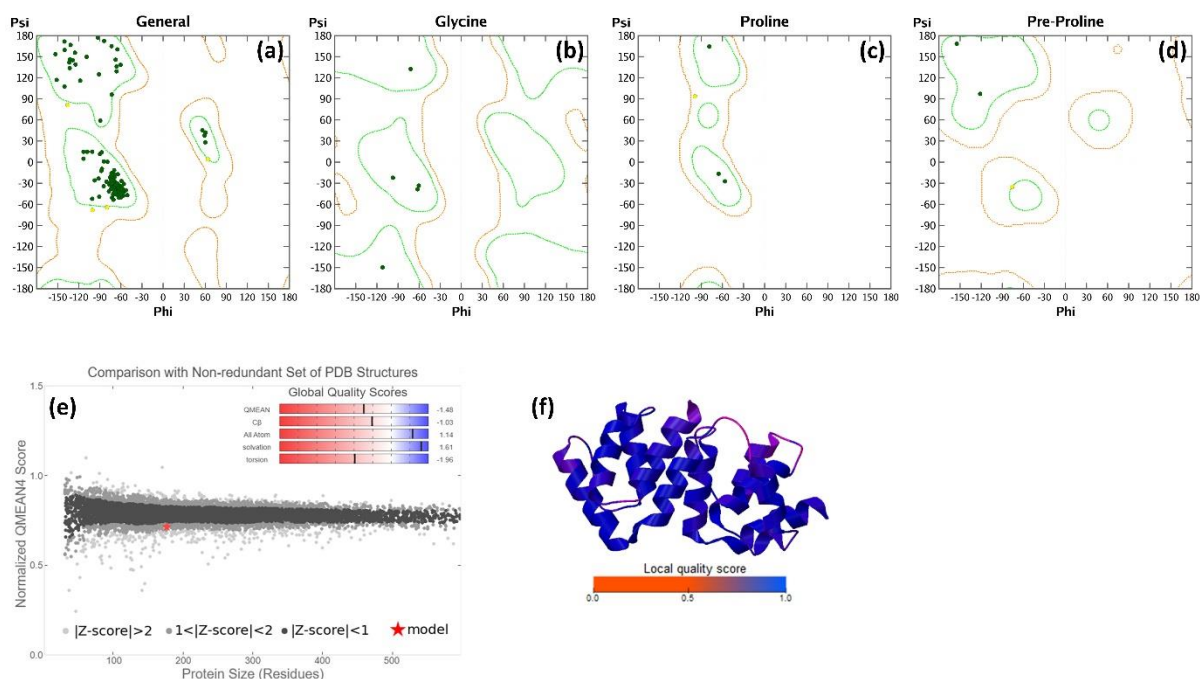

**Figure S6.** Structural quality assessment for the homology model of cFLIP<sub>DEDS</sub>. Ramachandran plots of (a) General, (b) Glycine, (c) Proline, and (d) Pre-Proline residues. The green and yellow circles represent the residues located in core and allowed regions, respectively. (e) Global quality estimation of the model through comparison of the normalized QMEAN4 scores (marked by red asterisk) with a non-redundant set of pdb structures of similar size. The QMEAN score of the model and its components (C $\beta$ , all-atom, solvation, and torsion) are shown as inset. (f) Local quality estimation based on the residue QMEAN score values.

**Table S2.** The specified residues in PP docking procedure.

| PP complex                                     | Components            | Residues               |
|------------------------------------------------|-----------------------|------------------------|
| <b>Fas<sub>DD</sub>-Fas<sub>DD</sub></b>       | Fas <sub>DD</sub>     | K299, I310             |
|                                                | Fas <sub>DD</sub>     | K299, I310             |
| <b>Fas<sub>DD</sub>-FADD<sub>DD</sub></b>      | Fas <sub>DD</sub>     | Y232, T235, I295, L298 |
|                                                | FADD <sub>DD</sub>    | L172, L176, L186       |
| <b>FADD<sub>DED</sub>-C8<sub>DEDS</sub></b>    | FADD <sub>DED</sub>   | F25, L26               |
|                                                | C8 <sub>DEDS</sub>    | Y8                     |
| <b>FADD<sub>DED</sub>-cFLIP<sub>DEDS</sub></b> | FADD <sub>DED</sub>   | F25, L26               |
|                                                | cFLIP <sub>DEDS</sub> | H7                     |
| <b>C8<sub>DEDS</sub>-C8<sub>DEDS</sub></b>     | C8 <sub>DEDS</sub>    | F122, L123             |
|                                                | C8 <sub>DEDS</sub>    | Y8                     |
| <b>C8<sub>DEDS</sub>-cFLIP<sub>DEDS</sub></b>  | C8 <sub>DEDS</sub>    | F122, L123             |
|                                                | cFLIP <sub>DEDS</sub> | H7                     |



(a)

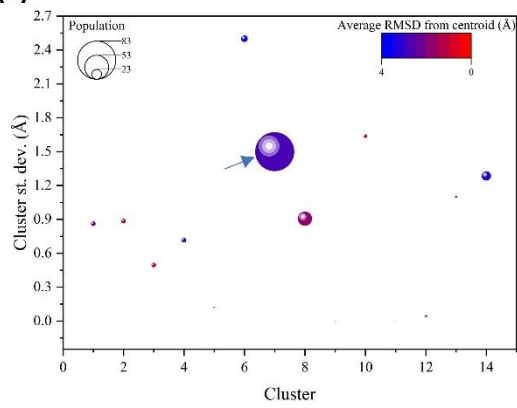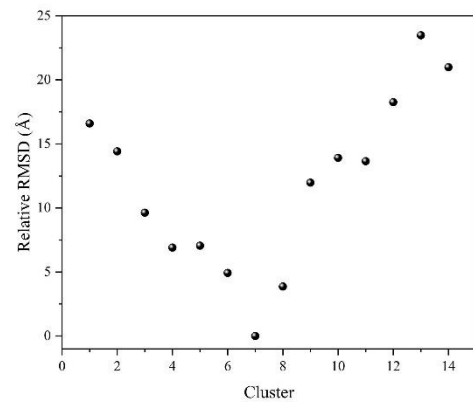

(b)

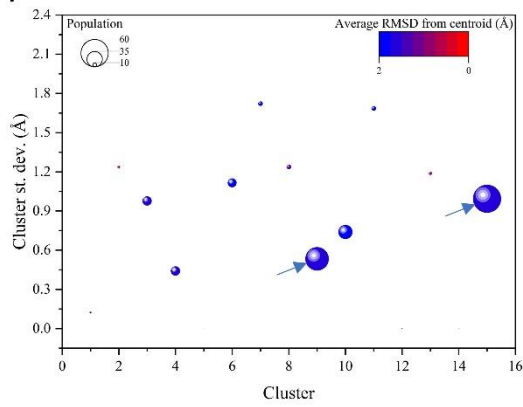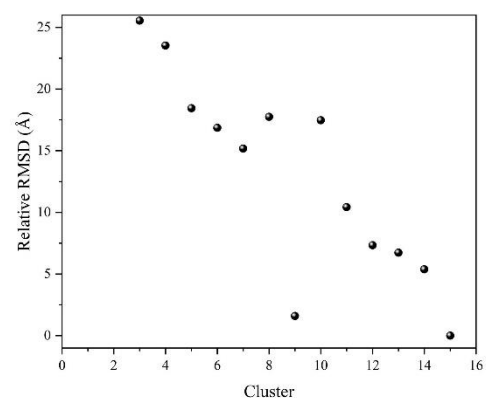

(c)

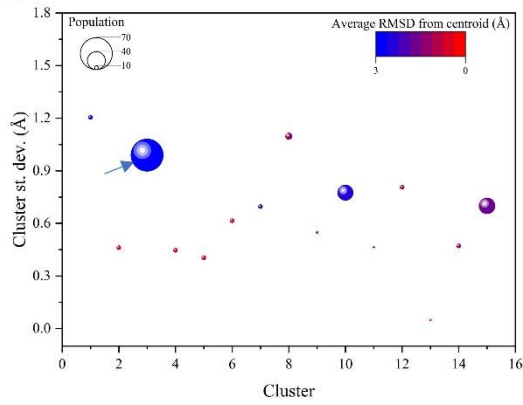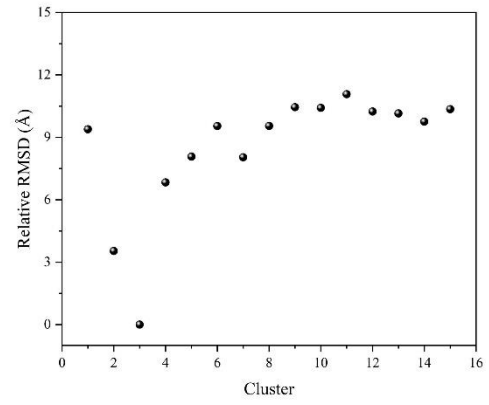

(d)

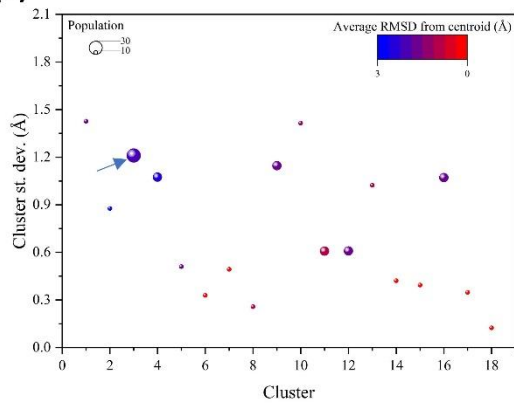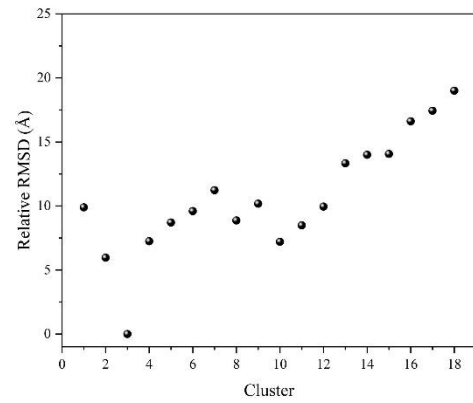



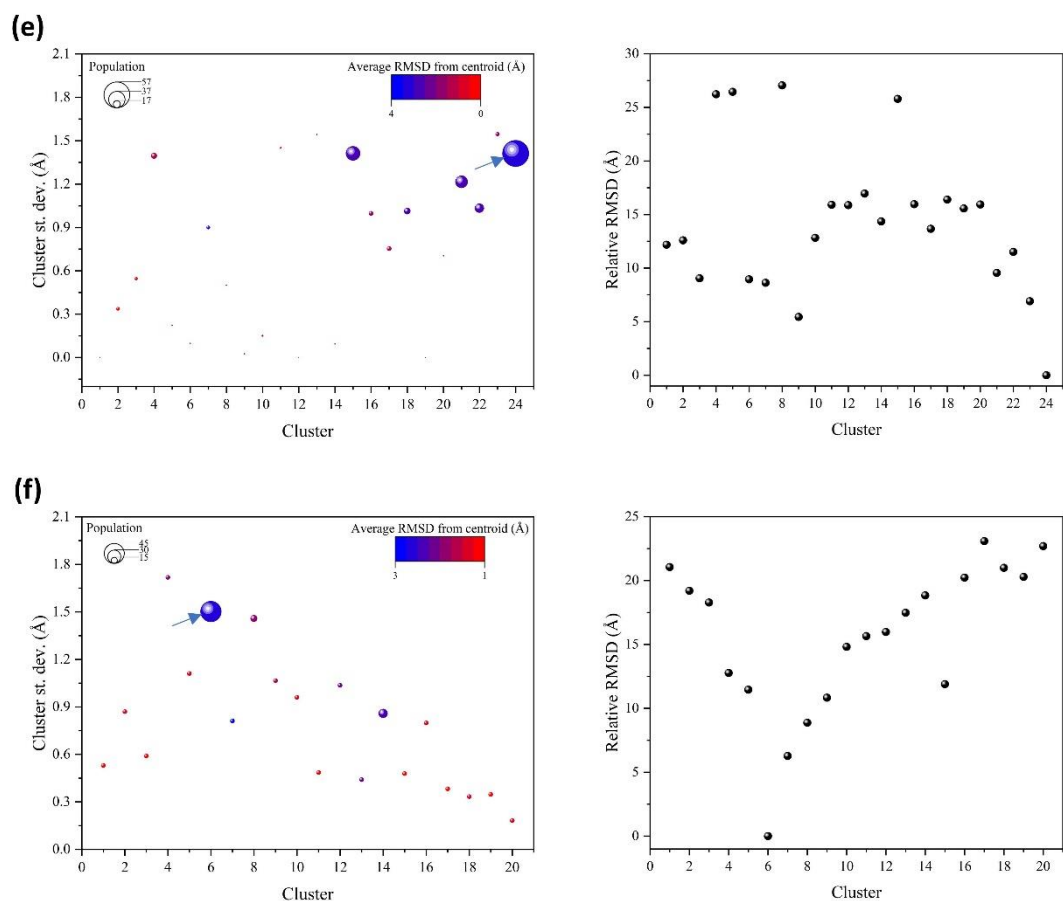

**Figure S7.** Left hand panels: The standard deviation (y-axis), population (sphere size), and average RMSD (coloration) from the centroid within each cluster. Right hand panels: Relative RMSD values between the centroid of each cluster and the centroid of the most populated one. (a)  $\text{FaS}_{\text{DD}}-\text{FaS}_{\text{DD}}$ , (b)  $\text{FaS}_{\text{DD}}-\text{FADD}_{\text{DD}}$ , (c)  $\text{FADD}_{\text{DED}}-\text{C8}_{\text{DEDS}}$ , (d)  $\text{FADD}_{\text{DED}}-\text{cFLIP}_{\text{DEDS}}$ , (e)  $\text{C8}_{\text{DEDS}}-\text{C8}_{\text{DEDS}}$ , and (f)  $\text{C8}_{\text{DEDS}}-\text{cFLIP}_{\text{DEDS}}$ . The most populated clusters are indicated by small arrows.

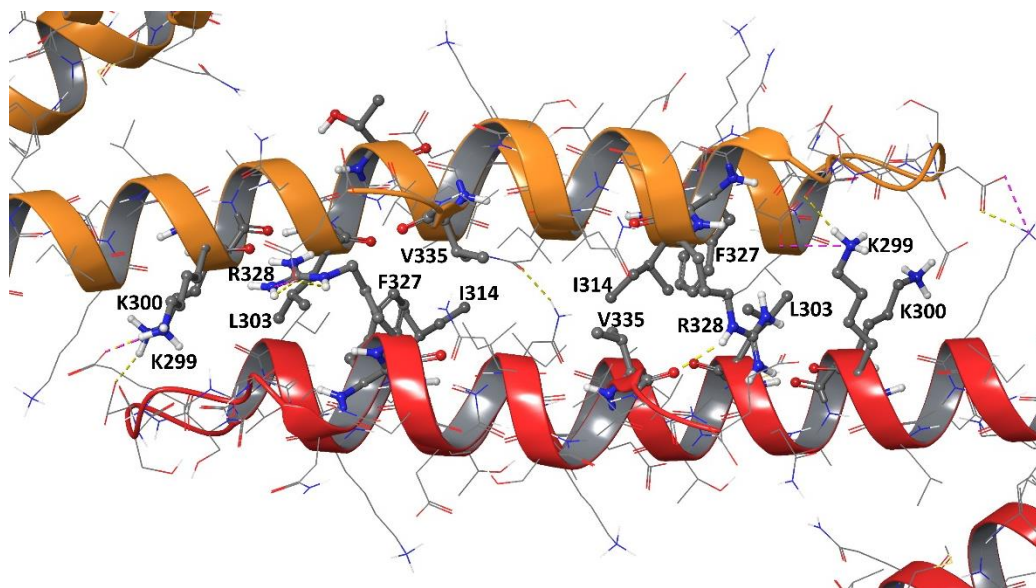

**Figure S8.** Close-up view of atomic contacts in the Fas<sub>DD</sub>-Fas<sub>DD</sub> complex. The Fas<sub>1,DD</sub> and Fas<sub>2,DD</sub> chains are presented in red and orange colors, respectively. Key interacting residues (Table1) are presented in ball-and-stick representation. Hydrogen atoms bound to carbon atoms are omitted for clarity.

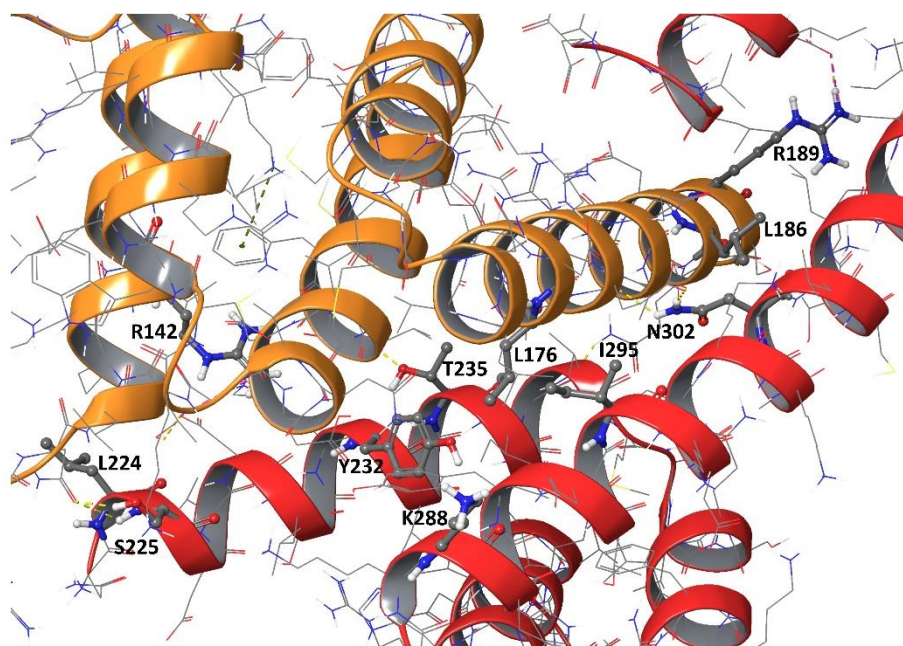

**Figure S9.** Close-up view of atomic contacts in the Fas<sub>DD</sub>-FADD<sub>DD</sub> complex. The Fas<sub>DD</sub> and FADD<sub>DD</sub> chains are presented in red and orange colors, respectively. Key interacting residues (Table2) are presented in ball-and-stick representation. Hydrogen atoms bound to carbon atoms are omitted for clarity.

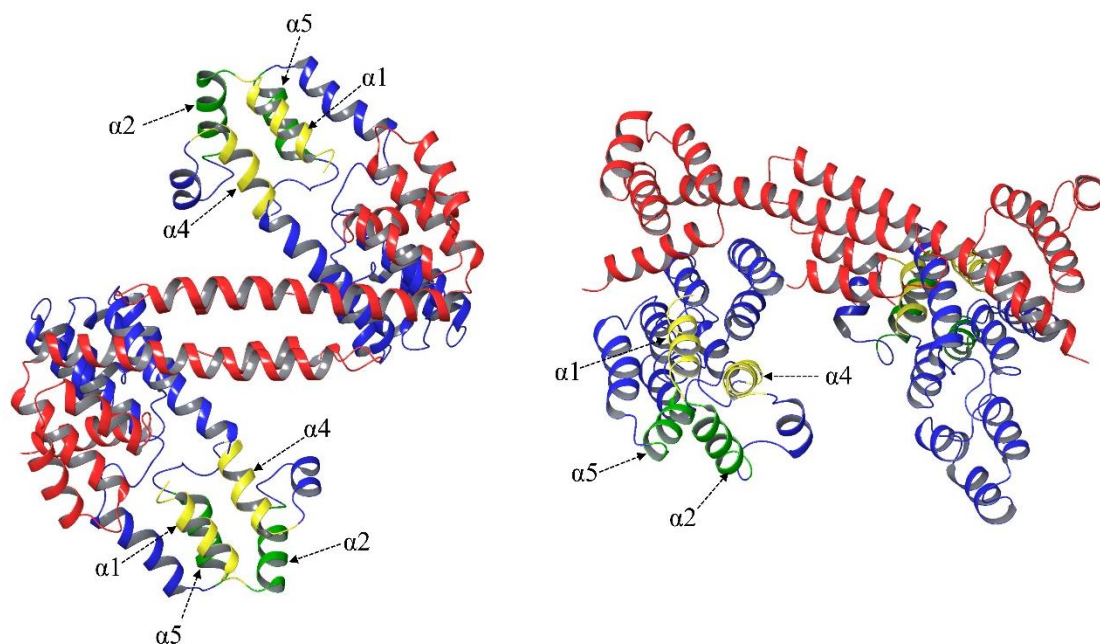

**Figure S10.** Top (left) and side (right) views of  $\alpha1/\alpha4$  (in yellow) and  $\alpha2/\alpha5$  (in green) helices of FADD<sub>DED</sub> in the Fas<sub>DD</sub>-FADD<sub>full</sub> complex. The Fas<sub>DD</sub> and FADD<sub>full</sub> are represented in red and blue colors, respectively.

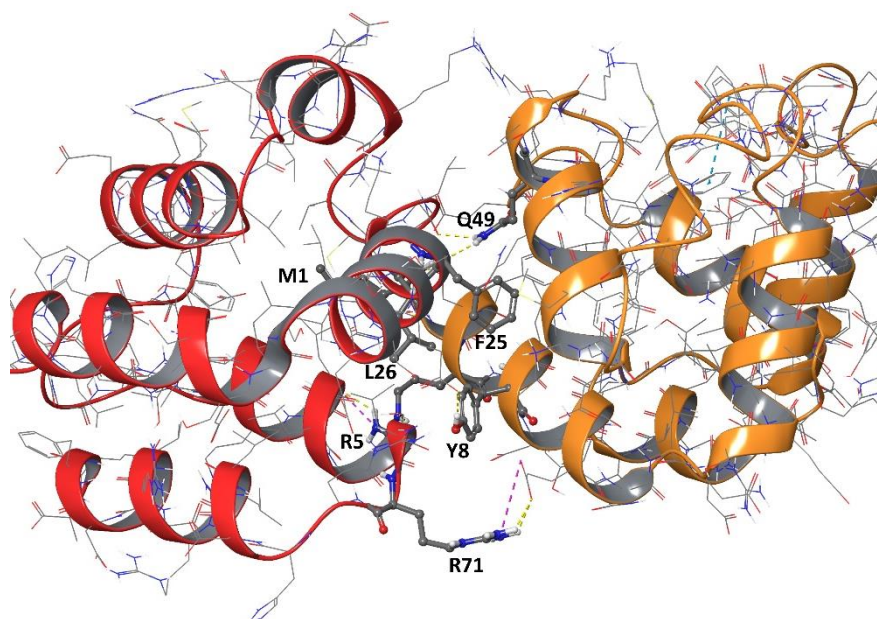

**Figure S11.** Close-up view of atomic contacts in the FADD<sub>DED</sub>-C8<sub>DED</sub> complex. The FADD<sub>DED</sub> and C8<sub>DED</sub> chains are presented in red and orange colors, respectively. Key interacting residues (Table 3) are presented in ball-and-stick representation. Hydrogen atoms bound to carbon atoms are omitted for clarity.



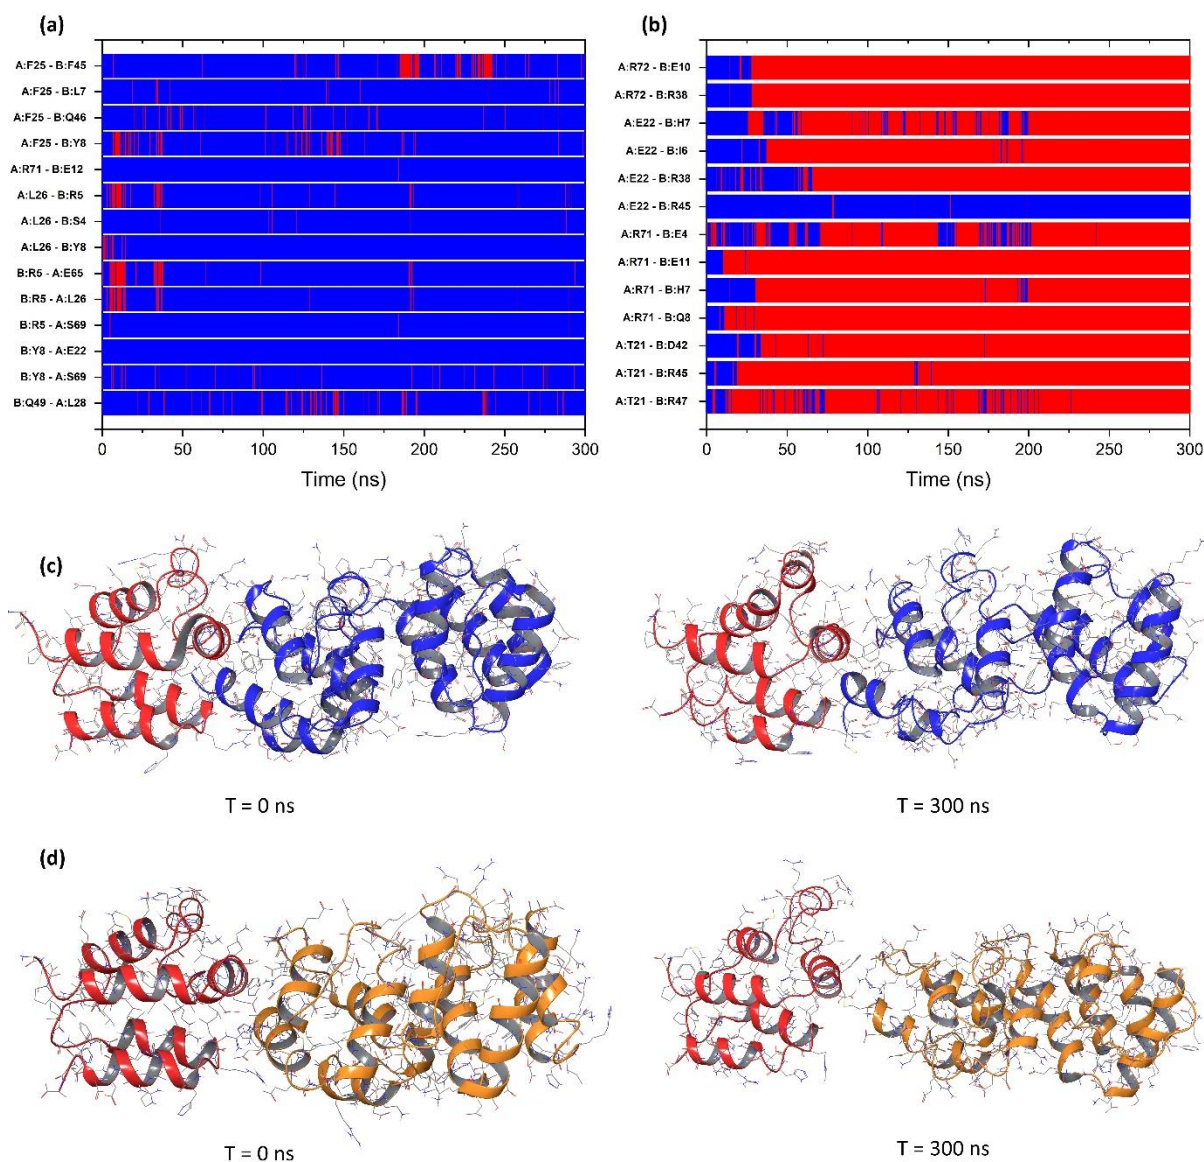

**Figure S12.** The native residue contacts profiles during 300 ns MD simulation for (a) FADD<sub>DED</sub>-C8<sub>DEDS</sub> and (b) FADD<sub>DED</sub>-cFLIP<sub>DEDS</sub> complexes. The blue and red colors indicate that the specific native contact was maintained or diminished, respectively. Chain A and B represent FADD<sub>DED</sub> and C8<sub>DEDS</sub>/cFLIP<sub>DEDS</sub> molecules, respectively. The first (t = 0 ns) and last (t = 300 ns) snapshots of MD trajectory for (a) FADD<sub>DED</sub>-C8<sub>DEDS</sub> and (b) FADD<sub>DED</sub>-cFLIP<sub>DEDS</sub> complexes. FADD<sub>DED</sub> is shown by red ribbon while C8<sub>DEDS</sub> and cFLIP<sub>DEDS</sub> are presented by blue and orange ribbons, respectively.

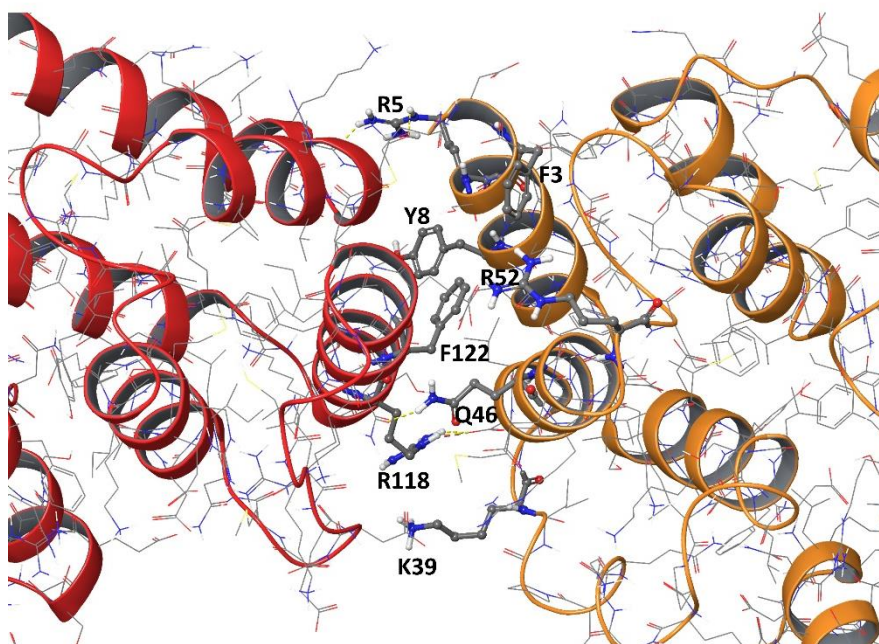

**Figure S13.** Close-up view of atomic contacts in the C8<sub>DEDS</sub>-C8<sub>DEDS</sub> complex. The C8<sub>1,DEDS</sub> and C8<sub>2,DEDS</sub> chains are presented in red and orange colors, respectively. Key interacting residues (Table 5) are presented in ball-and-stick representation. Hydrogen atoms bound to carbon atoms are omitted for clarity.

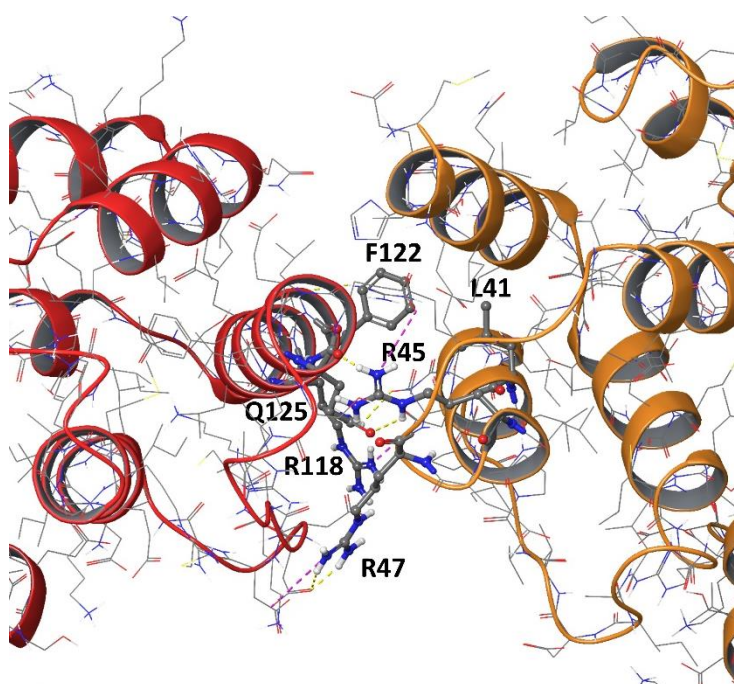

**Figure S14.** Close-up view of atomic contacts in the C8<sub>DEDS</sub>-cFLIP<sub>DEDS</sub> complex. The C8<sub>DEDS</sub> and cFLIP<sub>DEDS</sub> chains are presented in red and orange colors, respectively. Key interacting residues (Table 6) are presented in ball-and-stick representation. Hydrogen atoms bound to carbon atoms are omitted for clarity.

**Table S3:** Table of the primers used to clone the different inserts in the Linker-hRluc-F(1)\_pcDNA3.1(+) and Linker-hRluc-F(2)\_pcDNA3.1(+) and the name of the resulting fusion proteins.<sup>a</sup>

| Plasmid name                                | Primers (5' – 3')                                                     |                                                                    | Coding protein                    | Renilla Luc domain |
|---------------------------------------------|-----------------------------------------------------------------------|--------------------------------------------------------------------|-----------------------------------|--------------------|
|                                             | Forward                                                               | Reverse                                                            |                                   |                    |
| Caspase8-DED1_linker_hRluc-F(1)_pcDNA3.1(+) | <u>TAGTCCAGTGTGGTGAATTCGCCACCATGGA</u><br><u>CTTCAGCAGAAATCTTTATG</u> | <u>TCCAGAGCCACCGCCACCATCGATGTTTAGGTAGG</u><br><u>TAATCAGCAAATC</u> | Caspase 8 death effector domain 1 | Nterm-RLUC         |
| Caspase8-DED2_linker_hRluc-F(1)_pcDNA3.1(+) | <u>TAGTCCAGTGTGGTGAATTCGCCACCATG</u><br><u>GCCTACAGGGTCATGCTCTA</u>   | <u>TCCAGAGCCACCGCCACCATCGATGTCGTTGATTAT</u><br><u>CTTCAGCAG</u>    | Caspase 8 death effector domain 2 | Nterm-RLUC         |
| FLIP_linker_hRluc_F(1)_pcDNA3.1(+)          | <u>TAGTCCAGTGTGGTGAATTCGCCACCATGTCT</u><br><u>GCTGAAGTCATCCATC</u>    | <u>TCCAGAGCCACCGCCACCATCGATTGTGTAGGAGA</u><br><u>GGATAAGTTTC</u>   | cFLIP whole protein               | Nterm-RLUC         |
| FLIP_linker_hRluc_F(1)_pcDNA3.1(+)          | <u>TAGTCCAGTGTGGTGAATTCGCCACCATGTCT</u><br><u>GCTGAAGTCATCCATC</u>    | <u>TCCAGAGCCACCGCCACCATCGATTGTGTAGGAGA</u><br><u>GGATAAGTTTC</u>   | cFLIP whole protein               | Cterm-RLUC         |
| FLIP-DED1_linker_hRluc-F(2)_pcDNA3.1(+)     | <u>TAGTCCAGTGTGGTGAATTCGCCACCATGTCT</u><br><u>GCTGAAGTCATCCATC</u>    | <u>TCCAGAGCCACCGCCACCATCGATCTCAAGATAC</u><br><u>GTTTGAGCAGG</u>    | cFLIP death effector domain 1     | Cterm-RLUC         |
| FLIP-DED2_linker_hRluc-F(2)_pcDNA3.1(+)     | <u>TAGTCCAGTGTGGTGAATTCGCCACCATG</u><br><u>GACTATAGAGTGTGATGGC</u>    | <u>TCCAGAGCCACCGCCACCATCGATCTCTGGATTTC</u><br><u>TGTCCTCAGG</u>    | cFLIP death effector domain 2     | Cterm-RLUC         |

<sup>a</sup>The underlined parts of the primer sequence indicate the complementary area that hybridize to the gene of interest.

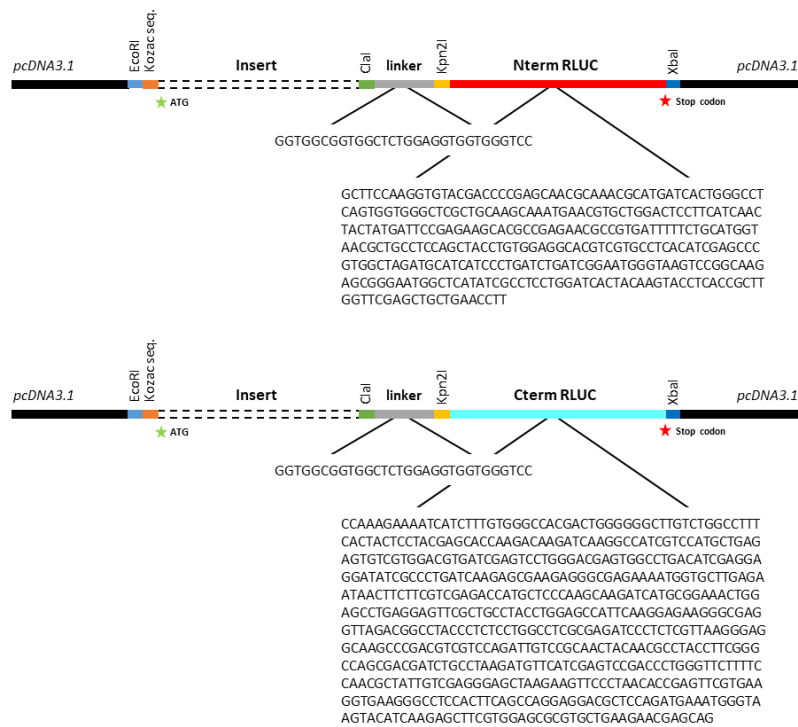

**Figure S15.** Schematic representation of the Linker-hRluc-F(1)\_pcDNA3.1(+) and Linker-hRluc-F(2)\_pcDNA3.1(+) plasmid coding parts. In both cases, the shortest sequence represents the linker, and the longer one represents the Nterm and Cterm Renilla Luciferase sequence fragments, respectively.

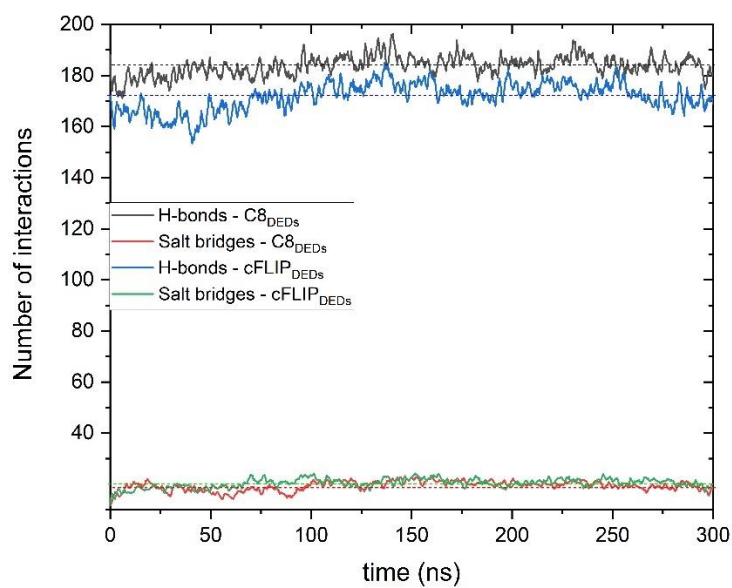

**Figure S16.** The number of hydrogen bond and salt bridge interactions within C8<sub>DEDS</sub> and cFLIP<sub>DEDS</sub> molecules during the 300 ns MD simulation.

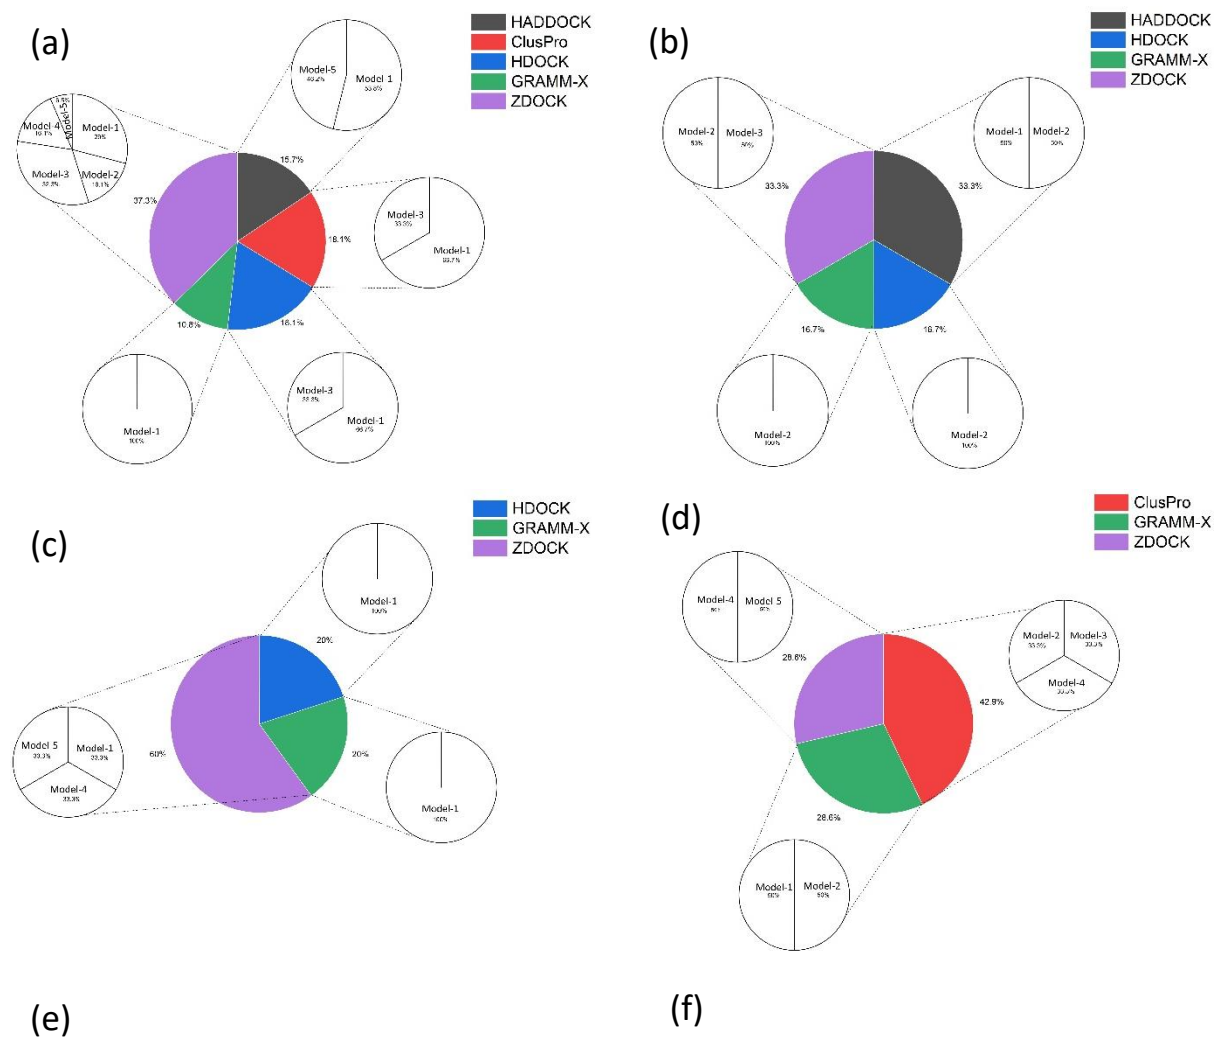



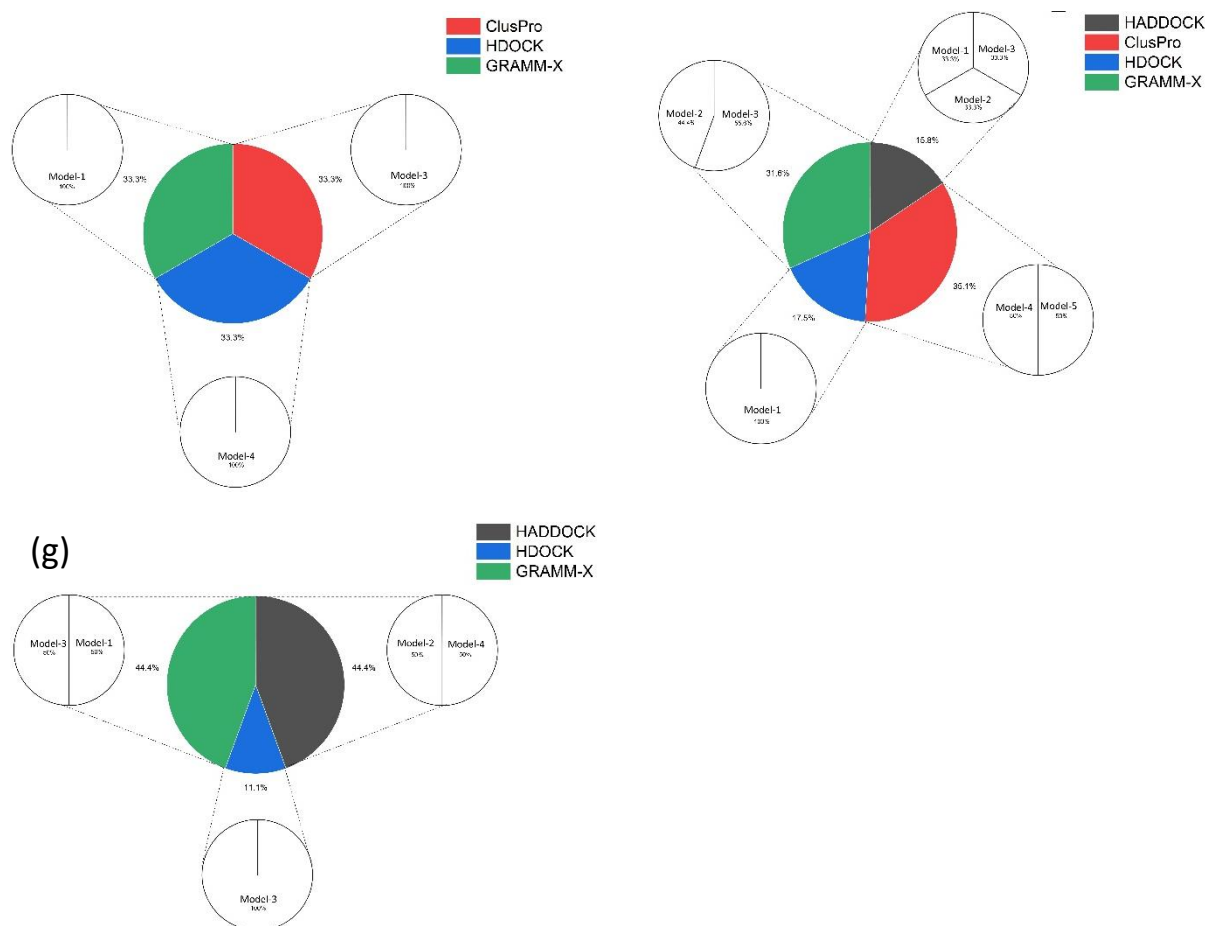

**Figure S17.** The contribution of each docking engines in the main clusters of (a) Fas<sub>DD</sub>-Fas<sub>DD</sub>, (b) Fas<sub>1,DD</sub>-FADD<sub>1,DD</sub>, (c) Fas<sub>2,DD</sub>-FADD<sub>2,DD</sub>, (d) FADD<sub>DED</sub>-C8<sub>DEDS</sub>, (e) FADD<sub>DED</sub>-cFLIP<sub>DEDS</sub>, (f) C8<sub>DEDS</sub>-C8<sub>DEDS</sub>, and (g) C8<sub>DEDS</sub>-cFLIP<sub>DEDS</sub> complexes.

**Table S4.** The cluster component analysis for the main cluster of Fas<sub>DD</sub>-Fas<sub>DD</sub> complex.

| Docking Engines | Models    | Components                                                  | # of components |
|-----------------|-----------|-------------------------------------------------------------|-----------------|
| ZDOCK           | ZDOCK_1   | ZDOCK_1_1 to ZDOCK_1_10 except ZDOCK_1_4                    | 9               |
|                 | ZDOCK_2   | ZDOCK_2_1 to ZDOCK_2_5                                      | 5               |
|                 | ZDOCK_3   | ZDOCK_3_1 to ZDOCK_3_10                                     | 10              |
|                 | ZDOCK_4   | ZDOCK_4_1 to ZDOCK_4_5                                      | 5               |
|                 | ZDOCK_5   | ZDOCK_5_1 and ZDOCK_5_2                                     | 2               |
| ClusPro         | ClusPro_1 | ClusPro_1_1 to ClusPro_1_10                                 | 10              |
|                 | ClusPro_3 | ClusPro_3_1 to ClusPro_3_5                                  | 5               |
| HDOCK           | HDOCK_1   | HDOCK_1_1 to HDOCK_1_10                                     | 10              |
|                 | HDOCK_3   | HDOCK_3_1 to HDOCK_3_5                                      | 5               |
| HADDOCK         | HADDOCK_1 | HADDOCK_1_2 and HADDOCK_1_3 and HADDOCK_1_6 to HADDOCK_1_10 | 7               |
|                 | HADDOCK_5 | HADDOCK_5_2 and HADDOCK_5_6 to HADDOCK_5_10                 | 6               |
| GRAMM-X         | GRAMM-X_1 | GRAMM-X_1_2 to GRAMM-X_1_10                                 | 9               |

**Table S5.** The cluster component analysis for the main cluster of Fas<sub>1,DD</sub>–FADD<sub>1,DD</sub> complex.

| Docking Engines | Models    | Components                  | # of components |
|-----------------|-----------|-----------------------------|-----------------|
| ZDOCK           | ZDOCK_2   | ZDOCK_2_1 to ZDOCK_2_10     | 10              |
|                 | ZDOCK_3   | ZDOCK_3_1 to ZDOCK_3_10     | 10              |
| HADDOCK         | HADDOCK_1 | HADDOCK_1_1 to HADDOCK_1_10 | 10              |
|                 | HADDOCK_2 | HADDOCK_2_1 to HADDOCK_2_10 | 10              |
| HDOCK           | HDOCK_2   | HDOCK_2_1 to HDOCK_2_10     | 10              |
| GRAMM-X         | GRAMM-X_2 | GRAMM-X_2_1 to GRAMM-X_2_10 | 10              |

**Table S6.** The cluster component analysis for the main cluster of Fas<sub>2,DD</sub>–FADD<sub>2,DD</sub> complex.

| Docking Engines | Models    | Components                  | # of components |
|-----------------|-----------|-----------------------------|-----------------|
| ZDOCK           | ZDOCK_1   | ZDOCK_1_1 to ZDOCK_1_10     | 10              |
|                 | ZDOCK_4   | ZDOCK_4_1 to ZDOCK_4_10     | 10              |
|                 | ZDOCK_5   | ZDOCK_5_1 to ZDOCK_5_10     | 10              |
| HDOCK           | HDOCK_1   | HDOCK_1_1 to HDOCK_1_10     | 10              |
| GRAMM-X         | GRAMM-X_1 | GRAMM-X_1_1 to GRAMM-X_1_10 | 10              |

**Table S7.** The cluster component analysis for the main cluster of FADD<sub>DED</sub>–C8<sub>DEDS</sub> complex.

| Docking Engines | Models    | Components                  | # of components |
|-----------------|-----------|-----------------------------|-----------------|
| ClusPro         | ClusPro_2 | ClusPro_2_1 to ClusPro_2_10 | 10              |
|                 | ClusPro_3 | ClusPro_3_1 to ClusPro_3_10 | 10              |
|                 | ClusPro_4 | ClusPro_4_1 to ClusPro_4_10 | 10              |
| GRAMM-X         | GRAMM-X_1 | GRAMM-X_1_1 to GRAMM-X_1_10 | 10              |
|                 | GRAMM-X_2 | GRAMM-X_2_1 to GRAMM-X_2_10 | 10              |
| ZDOCK           | ZDOCK_4   | ZDOCK_4_1 to ZDOCK_4_10     | 10              |
|                 | ZDOCK_5   | ZDOCK_5_1 to ZDOCK_5_10     | 10              |

**Table S8.** The cluster component analysis for the main cluster of FADD<sub>DED</sub>–cFLIP<sub>DEDS</sub> complex.

| Docking Engines | Models    | Components                  | # of components |
|-----------------|-----------|-----------------------------|-----------------|
| ClusPro         | ClusPro_3 | ClusPro_3_1 to ClusPro_3_10 | 10              |
| GRAMM-X         | GRAMM-X_1 | GRAMM-X_1_1 to GRAMM-X_1_10 | 10              |
| HDOCK           | HDOCK_4   | HDOCK_4_1 to HDOCK_4_10     | 10              |

**Table S9.** The cluster component analysis for the main cluster of C8<sub>DEDS</sub>–C8<sub>DEDS</sub> complex.

| Docking Engines | Models    | Components                  | # of components |
|-----------------|-----------|-----------------------------|-----------------|
| ClusPro         | ClusPro_4 | ClusPro_4_1 to ClusPro_4_10 | 10              |
|                 | ClusPro_5 | ClusPro_5_1 to ClusPro_5_10 | 10              |
| GRAMM-X         | GRAMM-X_2 | GRAMM-X_2_1 to GRAMM-X_2_10 | 10              |
|                 | GRAMM-X_3 | GRAMM-X_3_1 to GRAMM-X_3_8  | 8               |
| HDOCK           | HDOCK_1   | HDOCK_1_1 to HDOCK_1_10     | 10              |
| HADDOCK         | HADDOCK_1 | HADDOCK_1_6 to HADDOCK_1_8  | 3               |
|                 | HADDOCK_2 | HADDOCK_2_1 to HADDOCK_2_3  | 3               |
|                 | HADDOCK_3 | HADDOCK_3_1 to HADDOCK_1_3  | 3               |

**Table S10.** The cluster component analysis for the main cluster of C8<sub>DEDS</sub>–cFLIP<sub>DEDS</sub> complex.

| Docking Engines | Models    | Components                  | # of components |
|-----------------|-----------|-----------------------------|-----------------|
| HADDOCK         | HADDOCK_2 | HADDOCK_2_1 to HADDOCK_2_10 | 10              |
|                 | HADDOCK_4 | HADDOCK_4_1 to HADDOCK_4_10 | 10              |
| GRAMM-X         | GRAMM-X_1 | GRAMM-X_1_1 to GRAMM-X_1_10 | 10              |
|                 | GRAMM-X_3 | GRAMM-X_3_1 to GRAMM-X_3_10 | 10              |
| HDOCK           | HDOCK_3   | HDOCK_3_1 to HDOCK_1_5      | 5               |

## References

1. Dominguez, C.; Boelens, R.; Bonvin, A. M. J. J., HADDOCK: A Protein–Protein Docking Approach Based on Biochemical or Biophysical Information. *J. Am. Chem. Soc.* **2003**, *125*, 1731-1737.
2. van Zundert, G. C. P.; Rodrigues, J. P. G. L. M.; Trellet, M.; Schmitz, C.; Kastiris, P. L.; Karaca, E.; Melquiond, A. S. J.; van Dijk, M.; de Vries, S. J.; Bonvin, A. M. J. J., The HADDOCK2.2 Web Server: User-Friendly Integrative Modeling of Biomolecular Complexes. *J. Mol. Biol.* **2016**, *428*, 720-725.
3. Kozakov, D.; Hall, D. R.; Xia, B.; Porter, K. A.; Padhorny, D.; Yueh, C.; Beglov, D.; Vajda, S., The ClusPro web server for protein–protein docking. *Nat. Protoc.* **2017**, *12*, 255-278.
4. Comeau, S. R.; Gatchell, D. W.; Vajda, S.; Camacho, C. J., ClusPro: an automated docking and discrimination method for the prediction of protein complexes. *Bioinformatics* **2004**, *20*, 45-50.
5. Yan, Y.; Tao, H.; He, J.; Huang, S.-Y., The HDock server for integrated protein–protein docking. *Nat. Protoc.* **2020**, *15*, 1829-1852.
6. Yan, Y.; Zhang, D.; Zhou, P.; Li, B.; Huang, S.-Y., HDock: a web server for protein–protein and protein–DNA/RNA docking based on a hybrid strategy. *Nucleic Acids Res.* **2017**, *45*, W365-W373.
7. Tovchigrechko, A.; Vakser, I. A., GRAMM-X public web server for protein–protein docking. *Nucleic Acids Res.* **2006**, *34*, W310-W314.
8. Chen, R.; Li, L.; Weng, Z., ZDOCK: An initial-stage protein-docking algorithm. *Proteins: Structure, Function, and Bioinformatics* **2003**, *52*, 80-87.
9. Pierce, B. G.; Hourai, Y.; Weng, Z., Accelerating Protein Docking in ZDOCK Using an Advanced 3D Convolution Library. *PLoS One* **2011**, *6*, e24657.
